# Supplementary material
Source: Springer Nature journal article supplement (https://www.springermedizin.de/resource/supplementary/13024_2014_532_MOESM5_ESM.pdf/9644330)

A

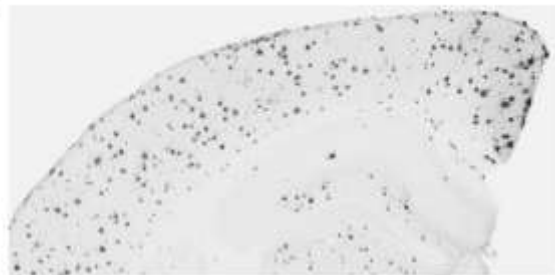

TREM2 WT

B

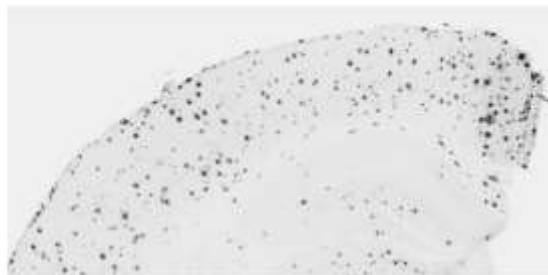

TREM2 Het

C

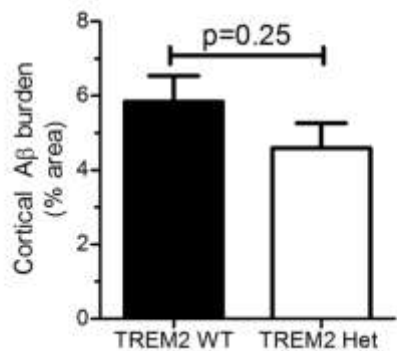

D

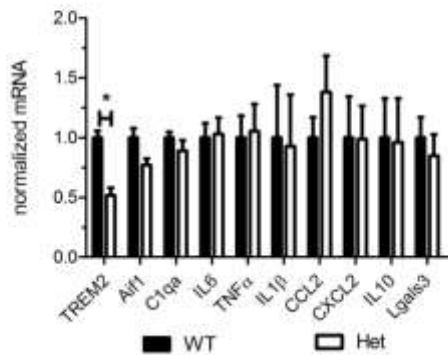

Supplement: MOESM5 [file 9644330]
